# Supplementary material for: OBE3 and WUS Interaction in Shoot Meristem Stem Cell Regulation
Source: PubMed Central journal article supplement (PMC4873020; doi:10.1371/journal.pone.0155657), 2016-05-19
Supplement: pone.0155657.s007.pdf [file pone.0155657.s007.pdf]

**S2 Table. *OBE3* T-DNA insertion lines enhance *wus-6*.**

| genotype of mother      | N  | % of plants with disorganized leaves, no stem at 30 DAG |
|-------------------------|----|---------------------------------------------------------|
| <i>Ler</i>              | 20 | 0.0                                                     |
| <i>wus-1/+</i>          | 8  | 25.0                                                    |
| <i>wus-6/+</i>          | 10 | 0.0                                                     |
| <i>obe3-2</i>           | 10 | 0.0                                                     |
| <i>obe3-2 wus-6/+</i>   | 11 | 36.4                                                    |
| <i>obe3-3</i>           | 10 | 0.0                                                     |
| <i>obe3-3/+ wus-6/+</i> | 36 | 11.1                                                    |
| <i>obe3-4</i>           | 10 | 0.0                                                     |
| <i>obe3-4/+ wus-6/+</i> | 42 | 7.1                                                     |

The T-DNA insertion mutants *obe3-3* and *obe3-4* were crossed to *wus-6/+*, and the phenotypes of segregating F2 seedlings were analyzed together with the single mutants at 30 days after germination.
