# Supplementary material for: OBE3 and WUS Interaction in Shoot Meristem Stem Cell Regulation
Source: PLOS journal article supplement (doi:10.1371/journal.pone.0155657), 2016-05-19
Supplement: S6 (10.1371/journal.pone.0155657.s006) [file journal.pone.0155657.s006]

**S1 Table. A genomic *gOBE3* fragment suppresses the effects of the *wen9* mutation.**

| Construct                                                                                                                                                                           | n  | % of the transformants |          |                    |
|-------------------------------------------------------------------------------------------------------------------------------------------------------------------------------------|----|------------------------|----------|--------------------|
|                                                                                                                                                                                     |    | wt-like                | no shoot | <i>wus-6</i> -like |
| <i>gOBE3</i>                                                                                                                                                                        | 56 | 66.1                   | 0.0      | 33.9               |
| Control, empty vector                                                                                                                                                               | 22 | 77.3                   | 22.7     | 0.0                |
| T1 seedlings of transformed <i>wus-6/+</i> mother plants were selected on hygromycin supplemented media for 12 days and then transferred to soil for phenotypic analysis at 30 DAG. |    |                        |          |                    |
| <i>wus-6</i> like: indeterminate shoot but prematurely terminated floral meristems                                                                                                  |    |                        |          |                    |
